# Supplementary material for: High Frequency of COVID-19 Vaccine Hesitancy among Canadians Immunized for Influenza: A Cross-Sectional Survey
Source: Vaccines (Basel). 2022 Sep 10;10(9):1514. doi: 10.3390/vaccines10091514 (PMC9506006; doi:10.3390/vaccines10091514)
Supplement: Supplementary file 1 [file vaccines-10-01514-s001.zip › vaccines-1885445-supplementary.pdf]

## Supplementary Data

**Supplementary Table S1.** Characteristics of patients by type of dataset (Imputed vs. Non-Imputed)

| Variables                                | Imputed <sup>a</sup><br>(N=1,793) | Non-Imputed <sup>b</sup><br>(N=1,793) |
|------------------------------------------|-----------------------------------|---------------------------------------|
|                                          | n (%) or mean $\pm$ SD            | n (%) or mean $\pm$ SD                |
| <b>Age</b>                               | 52.2 $\pm$ 16.9                   | 52.2 $\pm$ 16.9                       |
| <b>Sex</b>                               |                                   |                                       |
| Female                                   | 1051 (58.6)                       | 1024 (58.5)                           |
| Male                                     | 742 (41.4)                        | 727 (41.5)                            |
| <b>Role</b>                              |                                   |                                       |
| Patient                                  | 820 (45.7)                        | 795(45.8)                             |
| Healthcare professional                  | 542 (30.2)                        | 524 (30.2)                            |
| Family Member                            | 228 (12.7)                        | 220 (12.7)                            |
| Other                                    | 203 (11.3)                        | 195 (11.2)                            |
| <b>Vulnerable population<sup>c</sup></b> |                                   |                                       |
| No                                       | 1377 (76.8)                       | 1332 (85.1)                           |
| Yes                                      | 416 (23.2)                        | 234 (14.9)                            |
| <b>Education</b>                         |                                   |                                       |
| Some High-School or Less                 | 106 (5.9)                         | 106 (6.0)                             |
| High-School Graduate                     | 260 (14.5)                        | 258 (14.5)                            |
| Technical/Vocational Training            | 419 (23.4)                        | 412 (23.2)                            |
| Bachelor's Degree or Above               | 1008 (56.2)                       | 1000 (56.3)                           |
| <b>Employment</b>                        |                                   |                                       |
| No                                       | 287 (16.0)                        | 286 (16.1)                            |
| Yes                                      | 1116 (62.2)                       | 1102 (62.0)                           |
| Retired                                  | 390 (21.8)                        | 389 (21.9)                            |
| <b>Living...</b>                         |                                   |                                       |
| Alone                                    | 405 (22.6)                        | 370 (21.1)                            |
| With healthy adults                      | 611 (34.1)                        | 611 (34.8)                            |
| With susceptible people <sup>d</sup>     | 353 (19.7)                        | 350 (19.9)                            |
| With high-risk people <sup>e</sup>       | 424 (23.6)                        | 424 (24.2)                            |
| <b>Immunosuppressed</b>                  |                                   |                                       |
| No                                       | 1433 (79.9)                       | 1429 (80.5)                           |
| Yes - rheumatic disease                  | 191 (10.7)                        | 183 (10.3)                            |
| Yes - other <sup>f</sup>                 | 169 (9.4)                         | 163 (9.2)                             |
| <b>Cancer</b>                            |                                   |                                       |
| No                                       | 1523 (84.9)                       | 1517 (85.0)                           |

|                                                                                                               |             |             |
|---------------------------------------------------------------------------------------------------------------|-------------|-------------|
| Yes                                                                                                           | 270 (15.1)  | 268 (15.0)  |
| <b>Hypertension</b>                                                                                           |             |             |
| No                                                                                                            | 1431 (79.8) | 1420 (80.5) |
| Yes                                                                                                           | 362 (20.2)  | 344 (19.5)  |
| <b>Diabetes mellitus</b>                                                                                      |             |             |
| No                                                                                                            | 1600 (89.2) | 1593 (90.4) |
| Yes                                                                                                           | 193 (10.8)  | 169 (9.6)   |
| <b>Kidney disease</b>                                                                                         |             |             |
| No                                                                                                            | 1764 (98.4) | 1756 (98.4) |
| Yes                                                                                                           | 29 (1.6)    | 29 (1.6)    |
| <b>Smoking</b>                                                                                                |             |             |
| No                                                                                                            | 1641 (91.5) | 1623 (91.5) |
| Yes                                                                                                           | 152 (8.5)   | 150 (8.5)   |
| <b>Previous influenza vaccine</b>                                                                             |             |             |
| No                                                                                                            | 197 (11.0)  | 192 (10.8)  |
| Yes                                                                                                           | 1596 (89.0) | 1588 (89.2) |
| <b>Previously rejected influenza vaccine</b>                                                                  |             |             |
| No                                                                                                            | 1680 (93.7) | 1649 (93.9) |
| Yes                                                                                                           | 113 (6.3)   | 108 (6.1)   |
| <b>Previous COVID-19 diagnosis</b>                                                                            |             |             |
| No                                                                                                            | 1749 (97.5) | 1741 (97.5) |
| Yes                                                                                                           | 44 (2.5)    | 44 (2.5)    |
| <b>Perception of receiving enough information about COVID-19 prevention</b>                                   |             |             |
| No                                                                                                            | 95 (5.3)    | 89 (5.0)    |
| Yes                                                                                                           | 1698 (94.7) | 1689 (95.0) |
| <b>COVID-19 vaccine compulsory</b>                                                                            |             |             |
| No                                                                                                            | 217 (12.1)  | 215 (12.2)  |
| Yes                                                                                                           | 1011 (56.4) | 995 (56.4)  |
| Not Sure                                                                                                      | 565 (31.5)  | 555 (31.4)  |
| <b>Trust that the government is making decisions in citizens' best interest regarding COVID-19 vaccines</b>   |             |             |
| No                                                                                                            | 165 (9.2)   | 146 (8.6)   |
| Yes                                                                                                           | 1628 (90.8) | 1557 (91.4) |
| <b>Access barrier to vaccination would prevent participants from receiving a COVID-19 vaccine<sup>9</sup></b> |             |             |
| No                                                                                                            | 1280 (71.4) | 1246 (76.2) |
| Yes                                                                                                           | 513 (28.6)  | 389 (23.8)  |

|                                                                                       |             |             |
|---------------------------------------------------------------------------------------|-------------|-------------|
| <b>Trust pharmaceutical companies to provide safe and effective COVID-19 vaccines</b> |             |             |
| No                                                                                    | 89 (5.0)    | 81 (4.7)    |
| Yes                                                                                   | 964 (53.8)  | 937 (54.0)  |
| Not Sure                                                                              | 740 (41.3)  | 718 (41.4)  |
| <b>Concerns that a future COVID-19 vaccine might not be safe</b>                      |             |             |
| Not concerned at all                                                                  | 464 (25.9)  | 437 (25.2)  |
| A little concerned                                                                    | 1206 (67.3) | 1185 (68.4) |
| Very concerned                                                                        | 123 (6.9)   | 110 (6.4)   |
| <b>Vaccine benefits outweigh its risks</b>                                            |             |             |
| No                                                                                    | 54 (3.0)    | 47 (2.7)    |
| Yes                                                                                   | 1386 (77.3) | 1364 (78.6) |
| Not Sure                                                                              | 353 (19.7)  | 324 (18.7)  |
| <b>Social pressure to receive a COVID-19 vaccine in the future</b>                    |             |             |
| No                                                                                    | 1174 (65.5) | 1153 (66.3) |
| Yes                                                                                   | 366 (20.4)  | 349 (20.1)  |
| Not Sure                                                                              | 253 (14.1)  | 238 (13.7)  |
| <b>Language</b>                                                                       |             |             |
| English                                                                               | 1185 (66.1) | 1185 (66.1) |
| French                                                                                | 608 (33.9)  | 608 (33.9)  |
| <b>Risk-taking behaviour</b>                                                          |             |             |
| Low ( $\leq 26.67$ )                                                                  | 634 (35.4)  | 580 (33.4)  |
| Moderate (26.68 - 38.33)                                                              | 503 (28.1)  | 503 (28.9)  |
| High ( $\geq 38.34$ )                                                                 | 656 (36.6)  | 655 (37.7)  |

<sup>a</sup>Missing data were imputed using multiple imputation

<sup>b</sup>Results presented for individuals with available data

<sup>c</sup>Indigenous people, African American and Latin

<sup>d</sup>Adult older than 65 years, individual with chronic disease, or infant <6 months old.

<sup>e</sup>Child who goes to elementary school or young adult

<sup>f</sup>HIV, inflammatory bowel disease, cancer, and transplant

<sup>g</sup>Distance to the vaccine provider, time needed to get to the vaccine provider, waiting time at the vaccine provider, cost/parking in getting to the vaccine provider, and effort of traveling to the vaccine provider

**Supplementary Table S2.** Multivariate analysis of factors associated with vaccine hesitancy (non-hesitancy as reference group) – Reduced/Parsimonious Model (Backward Elimination)

| Level of Hesitancy to Receive COVID-19 Vaccine                                                              | aOR* (95%CI)                 |
|-------------------------------------------------------------------------------------------------------------|------------------------------|
| <b>Significant hesitant (scores 0-7)</b>                                                                    |                              |
| <b>Education</b>                                                                                            |                              |
| Some high school or less                                                                                    | <b>3.17 (1.66 - 6.07)</b>    |
| High school graduate                                                                                        | <b>1.77 (1.11 - 2.83)</b>    |
| Technical/vocational training                                                                               | <b>1.48 (1.00 - 2.18)</b>    |
| Bachelor's degree or above                                                                                  | Ref                          |
| <b>Living with...</b>                                                                                       |                              |
| Young children                                                                                              | <b>1.67 (1.05 - 2.65)</b>    |
| Susceptible people <sup>a</sup>                                                                             | 1.38 (0.83 - 2.27)           |
| Healthy adults                                                                                              | 1.03 (0.66 - 1.60)           |
| Alone                                                                                                       | Ref                          |
| <b>Immunosuppressed</b>                                                                                     |                              |
| Yes – other <sup>b</sup>                                                                                    | 0.70 (0.39 - 1.25)           |
| Yes – rheumatic disease                                                                                     | <b>1.73 (1.06 - 2.81)</b>    |
| No                                                                                                          | .                            |
| <b>Diabetes mellitus</b>                                                                                    |                              |
| Yes                                                                                                         | 1.52 (0.89 - 2.60)           |
| No                                                                                                          | Ref                          |
| <b>Perception of receiving enough information about COVID-19 prevention</b>                                 |                              |
| No                                                                                                          | <b>2.33 (1.18 - 4.61)</b>    |
| Yes                                                                                                         | Ref                          |
| <b>COVID-19 vaccine compulsory</b>                                                                          |                              |
| No                                                                                                          | <b>18.22 (11.07 - 29.99)</b> |
| Unsure                                                                                                      | <b>12.03 (8.06 -17.94)</b>   |
| Yes                                                                                                         | Ref                          |
| <b>Trust that the government is making decisions in citizens' best interest regarding COVID-19 vaccines</b> |                              |
| No                                                                                                          | 1.59 (0.95 - 2.66)           |
| Yes                                                                                                         | Ref                          |
| <b>Trust pharmaceutical companies to provide safe and effective COVID-19 vaccines</b>                       |                              |
| No                                                                                                          | <b>4.16 (2.03 - 8.53)</b>    |
| Unsure                                                                                                      | <b>3.13 (2.17 - 4.51)</b>    |

|                                                                             |                           |
|-----------------------------------------------------------------------------|---------------------------|
| Yes                                                                         | Ref                       |
| <b>Concerns that a future COVID-19 vaccine might not be safe</b>            |                           |
| Very concerned                                                              | <b>7.39 (3.51 -15.54)</b> |
| A little concerned                                                          | <b>2.01 (1.22 - 3.31)</b> |
| Not concerned at all                                                        | Ref                       |
| <b>Vaccine benefits outweigh its risks</b>                                  |                           |
| No                                                                          | <b>3.31 (1.46 - 7.52)</b> |
| Unsure                                                                      | <b>4.12 (2.80 - 6.06)</b> |
| Yes                                                                         | Ref                       |
| <b>Social pressure to receive a COVID-19 vaccine in the future</b>          |                           |
| Yes                                                                         | 1.18 (0.78 - 1.78)        |
| Unsure                                                                      | <b>2.24 (1.45 - 3.48)</b> |
| No                                                                          | Ref                       |
| <b>Mild hesitancy (scores 7.1-9.5)</b>                                      |                           |
| <b>Education</b>                                                            |                           |
| Some high school or less                                                    | 1.76 (0.95 - 3.26)        |
| High school graduate                                                        | 1.19 (0.77 - 1.83)        |
| Technical/vocational training                                               | <b>1.46 (1.04 - 2.05)</b> |
| Bachelor's degree or above                                                  | Ref                       |
| <b>Living with...</b>                                                       |                           |
| Young children                                                              | 1.48 (0.98 -2.24)         |
| Susceptible people <sup>a</sup>                                             | 1.17 (0.75 -1.83)         |
| Healthy adults                                                              | 1.38 (0.94 - 2.01)        |
| Alone                                                                       | Ref                       |
| <b>Immunosuppressed</b>                                                     |                           |
| Yes – other <sup>b</sup>                                                    | 0.71 (0.42 -1.18)         |
| Yes – rheumatic disease                                                     | 1.20 (0.76 -1.90)         |
| No                                                                          | Ref                       |
| <b>Diabetes mellitus</b>                                                    |                           |
| Yes                                                                         | 1.60 (1.01 - 2.52)        |
| No                                                                          | Ref                       |
| <b>Perception of receiving enough information about COVID-19 prevention</b> |                           |
| No                                                                          | <b>2.85 (1.59 - 5.11)</b> |
| Yes                                                                         | Ref                       |
| <b>COVID-19 vaccine compulsory</b>                                          |                           |
| No                                                                          | <b>4.12 (2.61 - 6.52)</b> |
| Unsure                                                                      | <b>4.99 (3.65 - 6.82)</b> |
| Yes                                                                         | Ref                       |

|                                                                                                             |                           |
|-------------------------------------------------------------------------------------------------------------|---------------------------|
| <b>Trust that the government is making decisions in citizens' best interest regarding COVID-19 vaccines</b> |                           |
| No                                                                                                          | 0.80 (0.46 - 1.40)        |
| Yes                                                                                                         | Ref                       |
| <b>Trust pharmaceutical companies to provide safe and effective COVID-19 vaccines</b>                       |                           |
| No                                                                                                          | 1.84 (0.90 - 3.74)        |
| Unsure                                                                                                      | <b>1.36 (1.00 - 1.84)</b> |
| Yes                                                                                                         | Ref                       |
| <b>Concerns that a future COVID-19 vaccine might not be safe</b>                                            |                           |
| Very concerned                                                                                              | <b>2.68 (1.17 - 6.11)</b> |
| A little concerned                                                                                          | <b>3.05 (2.01 - 4.64)</b> |
| Not concerned at all                                                                                        | Ref                       |
| <b>Vaccine benefits outweigh its risks</b>                                                                  |                           |
| No                                                                                                          | 0.30 (0.07 - 1.31)        |
| Unsure                                                                                                      | <b>1.73 (1.18 - 2.54)</b> |
| Yes                                                                                                         | Ref                       |
| <b>Social pressure to receive a COVID-19 vaccine in the future</b>                                          |                           |
| Yes                                                                                                         | <b>1.83 (1.31 - 2.57)</b> |
| Unsure                                                                                                      | <b>2.14 (1.42 - 3.21)</b> |
| No                                                                                                          | Ref                       |

\*aOR: Adjusted Odds Ratio. Adjustment was done for all variables shown in the table. Variable selection was done using stepwise backward elimination

<sup>a</sup>Adult older than 65 years, individual with chronic disease, or infant <6 months old.

<sup>b</sup>HIV, inflammatory bowel disease, cancer, and transplant

**Supplementary Figure S1.** Machine learning model (including only demographic information).

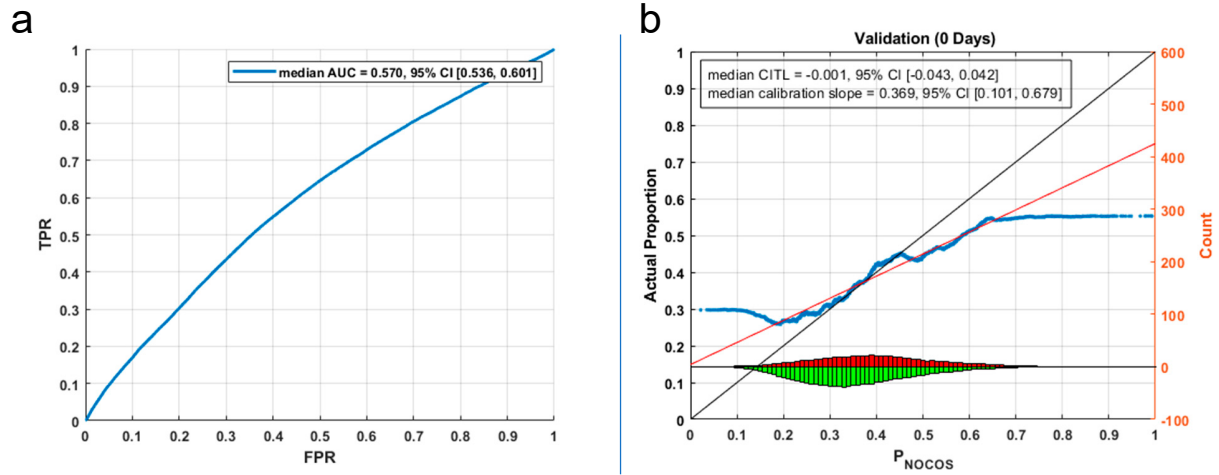

**(a)** ROC curve discriminative performance of the logistic regression machine learning model comparing no hesitancy with combined mild hesitancy and significant hesitancy. The median AUC and 95% CI is reported;  
**(b)** Calibration performance of the machine learning model.

**Supplementary Figure S2.** Machine learning correlates of vaccine hesitancy (including only demographic information).

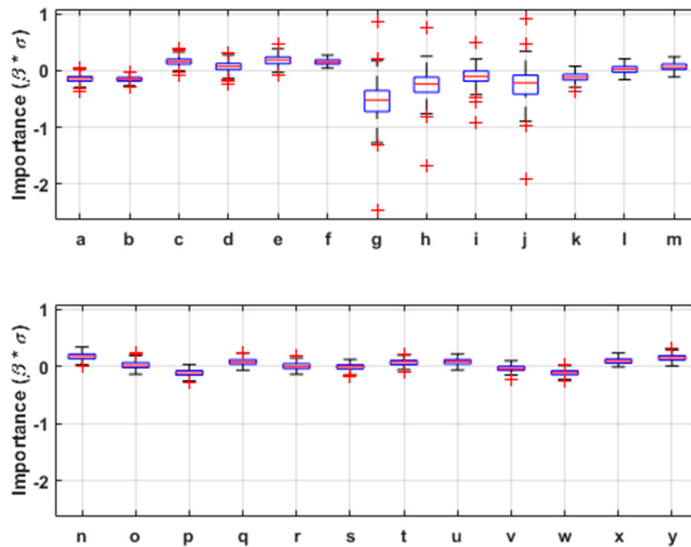

Boxplots of out-of-sample factor importance (adjusted odds ratio \* standard deviation) from a single imputation and 200 repetitions of bootstrap resampling for logistic regression models that correlate with significant or some hesitancy vs. no hesitancy.

<sup>a</sup>Age; <sup>b</sup>Sex (male); <sup>c</sup>Role (family member); <sup>d</sup>Role (health care professional); <sup>e</sup>Role (patient); <sup>f</sup>Part of a vulnerable population (yes); <sup>g</sup>Highest level of education (bachelor's degree or above); <sup>h</sup>Highest level of education (high school graduate); <sup>i</sup>Highest level of education (some high school); <sup>j</sup>Highest level of education (technical/vocational training); <sup>k</sup>Employment (retired); <sup>l</sup>Employment (yes); <sup>m</sup>Living with (healthy adults); <sup>n</sup>Living with (high risk people); <sup>o</sup>Living with (susceptible people); <sup>p</sup>Immunosuppression (yes - other); <sup>q</sup>Immunosuppression (yes - rheumatic disease); <sup>r</sup>Cancer (yes); <sup>s</sup>Hypertension (yes); <sup>t</sup>Diabetes mellitus (yes); <sup>u</sup>Kidney disease (yes); <sup>v</sup>Smoke (yes); <sup>w</sup>Previous influenza vaccine (yes); <sup>x</sup>Previous COVID-19 infection (yes); <sup>y</sup>Language (English)
